# Supplementary material for: Tracking the Selective Pressure Profile and Gene Flow of SARS-CoV-2 Delta Variant in Italy from April to October 2021 and Frequencies of Key Mutations from Three Representative Italian Regions
Source: MDPI journal article supplement (doi:10.3390/microorganisms11112644), 2023-10-27
Supplement: s1 [file s1]

**Table S1.** Selective pressure analysis on SARS-CoV-2 delta variant  
Italian protein coding sub-sets genomes

|                                                               |                                                                                                                                                                                                                                                                                                                                                                                                                                                                                                                                                                    |
|---------------------------------------------------------------|--------------------------------------------------------------------------------------------------------------------------------------------------------------------------------------------------------------------------------------------------------------------------------------------------------------------------------------------------------------------------------------------------------------------------------------------------------------------------------------------------------------------------------------------------------------------|
|                                                               | <i>nsp1</i>                                                                                                                                                                                                                                                                                                                                                                                                                                                                                                                                                        |
| Positively selected sites (w for sites > 1)<br>HYPHY software | 62 (P, S); 87 (E, D); 94 (G, S, V)                                                                                                                                                                                                                                                                                                                                                                                                                                                                                                                                 |
| Negatively selected sites (w for sites < 1)<br>HYPHY software | 16 (L), 35 (V), 105 (G), 116 (V), 160 (N)                                                                                                                                                                                                                                                                                                                                                                                                                                                                                                                          |
|                                                               | <i>nsp2</i>                                                                                                                                                                                                                                                                                                                                                                                                                                                                                                                                                        |
| Positively selected sites (w for sites > 1)<br>HYPHY software | 27 (R,C); 81 (K,N), 89 (E,K), 129 (P,L,S), 155 (D, G), 159 (A, V), 263 (S, F), 318 (A, V), 339 (G,S), 485 (V, I), 496 (Q, P, H)                                                                                                                                                                                                                                                                                                                                                                                                                                    |
| Negatively selected sites (w for sites < 1)<br>HYPHY software | 8 (N); 20 (C ); 101 (I); 154 (G); 179 (Y); 236 (C); 308 (V); 311 (V); 312 (K); 339 (G, S); 340 (A, V); 425 (V);<br>457 (E); 560 (I)                                                                                                                                                                                                                                                                                                                                                                                                                                |
|                                                               | <i>nsp3</i>                                                                                                                                                                                                                                                                                                                                                                                                                                                                                                                                                        |
| Positively selected sites (w for sites > 1)<br>HYPHY software | 126 (S, L); 384 (K, N); 862 (L,F); 1228 (P, L); 1791 (L, F)                                                                                                                                                                                                                                                                                                                                                                                                                                                                                                        |
| Negatively selected sites (w for sites < 1)<br>HYPHY software | 9 (D), 12 (V), 21 (V), 75 (L), 89 (L), 119 (E), 237 (T), 249 (H), 363 (N), 390 (K), 438 (Y), 466 (P), 506 (N), 534 (A), 567 (T), 622 (D), 629 (T), 646 (R),<br>667 (A), 694 (K), 714 (D), 717 (V), 806 (D), 881 (Y), 884 (A), 891 (N), 918 (F), 952 (Y), 955 (T), 978 (Y), 988 (M, G), 989 (M, S), 1089 (F), 1095 (D),<br>1107 (F), 1117 (I), 1141 (F), 1159 (P), 1181 (N), 1188 (N), 1210 (L), 1224 (E), 1254 (V), 1377 (P), 1416 (L), 1520 (F), 1528 (I), 1622 (G), 1649 (D),<br>1672 (I), 1698 (H), 1730 (K), 1828 (V), 1846 (E), 1859 (Y), 1860 (N), 1885 (V). |
|                                                               | <i>nsp4</i>                                                                                                                                                                                                                                                                                                                                                                                                                                                                                                                                                        |
| Positively selected sites (w for sites > 1)                   | 204 (T, I), 279 (D, N), 295 (T, I), 296 (C, F)                                                                                                                                                                                                                                                                                                                                                                                                                                                                                                                     |

HYPHY software

Negatively selected sites (w for sites < 1) 43 (I), 66 (N), 89 (P), 140 (I), 144 (D), 192 (V), 222 (R), 223 (H), 258 (V), 273 (Q), 290 (V), 318 (N), 337 (F), 378 (T), 390 (F), 410 (S),

HYPHY software 416 (A), 443 (R), 445 (L)

*nsp5*

Positively selected sites (w for sites > 1) /

HYPHY software

Negatively selected sites (w for sites < 1) 187 (D)

HYPHY software

*nsp6*

Positively selected sites (w for sites > 1) 2 (A, V), 6 (T, I), 27 (Q, R), 37 (L, F)

HYPHY software

Negatively selected sites (w for sites < 1) 16 (L), 179 (V), 183 (M, I), 200 (F), 229 (C), 259 (L)

HYPHY software

*nsp7*

Positively selected sites (w for sites > 1) /

HYPHY software

Negatively selected sites (w for sites < 1) 9 (T)

HYPHY software

*nsp8*

Positively selected sites (w for sites > 1) /

HYPHY software

Negatively selected sites (w for sites < 1) 185 (I)

|                                             |                                                                                                                                                                                                                                                                                              |
|---------------------------------------------|----------------------------------------------------------------------------------------------------------------------------------------------------------------------------------------------------------------------------------------------------------------------------------------------|
| HYPHY software                              |                                                                                                                                                                                                                                                                                              |
|                                             | <i>nsp9</i>                                                                                                                                                                                                                                                                                  |
| Positively selected sites (w for sites > 1) | /                                                                                                                                                                                                                                                                                            |
| HYPHY software                              |                                                                                                                                                                                                                                                                                              |
| Negatively selected sites (w for sites < 1) | 112 (L)                                                                                                                                                                                                                                                                                      |
| HYPHY software                              |                                                                                                                                                                                                                                                                                              |
|                                             | <i>nsp10</i>                                                                                                                                                                                                                                                                                 |
| Positively selected sites (w for sites > 1) | /                                                                                                                                                                                                                                                                                            |
| HYPHY software                              |                                                                                                                                                                                                                                                                                              |
| Negatively selected sites (w for sites < 1) | 34 (G), 48 (H), 59 (P)                                                                                                                                                                                                                                                                       |
| HYPHY software                              |                                                                                                                                                                                                                                                                                              |
|                                             | <i>nsp11</i>                                                                                                                                                                                                                                                                                 |
| Positively selected sites (w for sites > 1) | /                                                                                                                                                                                                                                                                                            |
| HYPHY software                              |                                                                                                                                                                                                                                                                                              |
| Negatively selected sites (w for sites < 1) | /                                                                                                                                                                                                                                                                                            |
| HYPHY software                              |                                                                                                                                                                                                                                                                                              |
|                                             | <i>nsp12</i>                                                                                                                                                                                                                                                                                 |
| Positively selected sites (w for sites > 1) | 46 (A, S), 61 (E, D, K), 95 (A, S), 141 (T, I), 197 (R, Q), 323 (P, L), 384 (S, P), 463 (M, I), 822 (Q, H), 838 (L, I)                                                                                                                                                                       |
| HYPHY software                              |                                                                                                                                                                                                                                                                                              |
| Negatively selected sites (w for sites < 1) | 37 (I), 39 (N), 59 (K,N), 61 (E,D,K), 83 (E), 168 (N), 177 (N,K), 212 (L), 217 (Y), 221 (D), 235 (D), 273 (Y), 275 (F), 291 (D), 301 (C),                                                                                                                                                    |
| HYPHY software                              |                                                                                                                                                                                                                                                                                              |
|                                             | 308 (L), 326 (F), 340 (F), 369 (K), 428 (F), 450 (I), 458 (Y), 463 (M, I), 495 (V), 541 (Q), 569 (R), 599 (H), 606 (Y), 608 (D), 657 (N),<br>691 (N), 700 (V), 701 (T), 702 (A), 713 (N), 752 (H), 760 (D), 765 (C), 769 (T), 770 (Y), 872 (H), 875 (Q), 885 (L), 891 (L), 894 (E), 910 (D). |
| HYPHY software                              |                                                                                                                                                                                                                                                                                              |
|                                             | <i>nsp13</i>                                                                                                                                                                                                                                                                                 |

|                                             |                                                                                                                                                                         |                     |
|---------------------------------------------|-------------------------------------------------------------------------------------------------------------------------------------------------------------------------|---------------------|
|                                             |                                                                                                                                                                         |                     |
| Positively selected sites (w for sites > 1) | 77 (P, L), 89 (V, I)                                                                                                                                                    |                     |
| HYPHY software                              |                                                                                                                                                                         |                     |
| Negatively selected sites (w for sites < 1) | 32 (D), 34 (V), 47 (P, L), 60 (V), 75 (H), 93 (Y), 139 (K), 151 (I), 177 (N), 234 (P), 258 (I), 311 (H), 318 (C), 323 (K), 336 (A), 360 (V),                            |                     |
| HYPHY software                              | 401 (D), 420 (E), 446 (A, P), 462 (K), 521 (V)                                                                                                                          |                     |
|                                             |                                                                                                                                                                         | <b><i>nsp14</i></b> |
| Positively selected sites (w for sites > 1) | 46 (P, L), 289 (R, H), 374 (S, F), 394 (A, V)                                                                                                                           |                     |
| HYPHY software                              |                                                                                                                                                                         |                     |
| Negatively selected sites (w for sites < 1) | 93 (G), 103 (T), 156 (G), 182 (V), 212 (R), 224 (Y), 232 (G), 235 (Y), 279 (C), 382 (C), 383 (L), 402 (D), 410 (N), 424 (H) , 428 (T)                                   |                     |
| HYPHY software                              |                                                                                                                                                                         |                     |
|                                             |                                                                                                                                                                         | <b><i>nsp15</i></b> |
| Positively selected sites (w for sites > 1) | 80 (A, V), 81 (A, V)                                                                                                                                                    |                     |
| HYPHY software                              |                                                                                                                                                                         |                     |
| Negatively selected sites (w for sites < 1) | 39 (D), 45 (N), 84 (V), 85 (I), 116 (C), 137 (A), 145 (E)                                                                                                               |                     |
| HYPHY software                              |                                                                                                                                                                         |                     |
|                                             |                                                                                                                                                                         | <b><i>nsp16</i></b> |
| Positively selected sites (w for sites > 1) | 9 (V, I), 34 (A, V), 215 (P, L, T)                                                                                                                                      |                     |
| HYPHY software                              |                                                                                                                                                                         |                     |
| Negatively selected sites (w for sites < 1) | 15 (Y), 17 (M, I), 45 (A), 55 (N), 56 (T), 66 (R), 93 (T), 107 (A), 116 (A), 155 (G), 167 (V), 170 (K), 199 (A), 237 (I), 250 (F), 266 (Q), 277 (K)                     |                     |
| HYPHY software                              |                                                                                                                                                                         |                     |
|                                             |                                                                                                                                                                         | <b><i>spike</i></b> |
| Positively selected sites (w for sites > 1) | 5 (L, F), 70 (V, I, F), 95 (T, I), 142 (G, D, Y, H, V), 222 (A, S, V), <b>367 (V, L, H, F), 452 (L, R), 501 (N, Y)</b> , 613 (Q, H), 614 (D, G), 677 (Q, H), 681 (P,R), |                     |

HYPHY software 950 (D, N), 1104 (V, L), 1128 (V, L), 1219 (G, V, C)

Negatively selected sites (w for sites < 1)  
HYPHY software 32 (F), 102 (R), 106 (F), 137 (N, K), 234 (N), 296 (L), 302 (T), 312 (I), 346 (R), 395 (V), 400 (F), 410 (I), 432 (C), 477 (S), 603 (N), 649 (C), 665 (P), 707 (Y), 732 (T), 760 (C), 856 (N), 935 (Q), 1061 (V), 1065 (V), 1119 (N), 1122 (V), 1230 (V), 1239 (S), 1257 (D)

***ORF3a***

Positively selected sites (w for sites > 1)  
HYPHY software 41 (L, I, F), 110 (A, S, V)

Negatively selected sites (w for sites < 1)  
HYPHY software 22 (D), 101 (L)

***E***

Positively selected sites (w for sites > 1)  
HYPHY software /

Negatively selected sites (w for sites < 1)  
HYPHY software /

***M***

Positively selected sites (w for sites > 1)  
HYPHY software 82 (I, T)

Negatively selected sites (w for sites < 1)  
HYPHY software 53 (F), 88 (V), 121 (N), 203 (N)

***ORF6***

|                                                               |                                                                                        |
|---------------------------------------------------------------|----------------------------------------------------------------------------------------|
| Positively selected sites (w for sites > 1)<br>HYPHY software | /                                                                                      |
| Negatively selected sites (w for sites < 1)<br>HYPHY software | 16 (L)                                                                                 |
| <b>ORF7a</b>                                                  |                                                                                        |
| Positively selected sites (w for sites > 1)<br>HYPHY software | /                                                                                      |
| Negatively selected sites (w for sites < 1)<br>HYPHY software | 69 (D)                                                                                 |
| <b>ORF8</b>                                                   |                                                                                        |
| Positively selected sites (w for sites > 1)<br>HYPHY software | /                                                                                      |
| Negatively selected sites (w for sites < 1)<br>HYPHY software | 46 (Y)                                                                                 |
| <b>N</b>                                                      |                                                                                        |
| Positively selected sites (w for sites > 1)<br>HYPHY software | 9 (Q, L, H)                                                                            |
| Negatively selected sites (w for sites < 1)<br>HYPHY software | 13 (P), 35 (A), 110 (F), 128 (D), 154 (N), 158 (V), 297 (D), 298 (Y), 302 (P), 329 (T) |
| <b>ORF 10</b>                                                 |                                                                                        |
| Positively selected sites (w for sites > 1)<br>HYPHY software | /                                                                                      |

Negatively selected sites (w for sites < 1) /

HYPHY software
