# Supplementary material for: Tracking the Selective Pressure Profile and Gene Flow of SARS-CoV-2 Delta Variant in Italy from April to October 2021 and Frequencies of Key Mutations from Three Representative Italian Regions
Source: MDPI journal article supplement (doi:10.3390/microorganisms11112644), 2023-10-27
Supplement: s1 [file s1]

**Table S2.** The prediction of the possible impact of the amino acid substitutions on the stability and structure of the proteins through I-Mutant 2.0 and PolyPhen-2.

|          |        | PolyPhen - 2      |       | I- Mutant 2.0 |       |
|----------|--------|-------------------|-------|---------------|-------|
| Mutation | Target | Prediction        | Score | Stability     | DDG   |
| P62S     | nsp1   | Probably Damaging | 0.978 | Decrease      | -1.84 |
| E87D     | nsp1   | Probably Damaging | 0.994 | Decrease      | -0.11 |
| G94S     | nsp1   | Probably Damaging | 1     | Decrease      | -0.71 |
| G94V     | nsp1   | Probably Damaging | 1     | Decrease      | -0.19 |
| R27C     | nsp2   | Probably Damaging | 1     | Decrease      | -0.35 |
| K81N     | nsp2   | Probably Damaging | 1     | Increase      | 0.05  |
| E89K     | nsp2   | Probably Damaging | 0.995 | Decrease      | -1.34 |
| P129L    | nsp2   | Possibly Damaging | 0.924 | Decrease      | -0.53 |
| P129S    | nsp2   | Probably Damaging | 1     | Decrease      | -2.45 |
| D155G    | nsp2   | Probably Damaging | 0.997 | Increase      | 0.09  |
| A159V    | nsp2   | Probably Damaging | 0.999 | Decrease      | -0.25 |
| S263F    | nsp2   | Possibly Damaging | 0.528 | Increase      | 0.34  |
| A318V    | nsp2   | Benign            | 0.043 | Decrease      | -1.24 |
| G339S    | nsp2   | Probably Damaging | 1     | Decrease      | -1.57 |
| V485I    | nsp2   | Benign            | 0.092 | Increase      | 0.33  |
| Q496P    | nsp2   | Possibly Damaging | 0.607 | Decrease      | -2.48 |
| Q496H    | nsp2   | Benign            | 0.003 | Decrease      | -1.69 |
| S126L    | nsp3   | Possibly Damaging | 0.585 | Increase      | 0.94  |
| K384N    | nsp3   | Benign            | 0.001 | No Change     | 0.00  |
| L862F    | nsp3   | Probably Damaging | 1     | Decrease      | -0.52 |
| P1228L   | nsp3   | Benign            | 0.001 | Decrease      | -0.46 |
| L1791F   | nsp3   | Probably Damaging | 0.999 | Decrease      | -0.55 |
| T204I    | nsp4   | Benign            | 0.002 | Decrease      | -1.08 |
| D279N    | nsp4   | Probably Damaging | 0.999 | Decrease      | -1.26 |
| T295I    | nsp4   | Probably Damaging | 0.999 | Decrease      | -0.02 |
| C296F    | nsp4   | Possibly Damaging | 0.896 | Decrease      | -0.70 |
| A2V      | nsp6   | Benign            | 0.306 | Decrease      | -0.50 |
| T6I      | nsp6   | Benign            | 0.000 | Decrease      | -0.93 |
| Q27R     | nsp6   | Probably Damaging | 0.998 | Decrease      | -0.95 |
| L37F     | nsp6   | Benign            | 0.027 | Decrease      | -0.05 |
| A46S     | nsp12  | Benign            | 0.001 | Decrease      | -0.64 |
| E61D     | nsp12  | Benign            | 0.000 | Decrease      | -0.86 |
| E61K     | nsp12  | Benign            | 0.159 | Decrease      | -1.74 |
| A95S     | nsp12  | Benign            | 0.090 | Decrease      | -0.55 |
| T141I    | nsp12  | Benign            | 0.008 | Decrease      | -1.65 |
| R197Q    | nsp12  | Benign            | 0.211 | Decrease      | -0.7  |
| P323L    | nsp12  | Benign            | 0.018 | Decrease      | -0.8  |

|          |        | PolyPhen - 2      |               | I- Mutant 2.0 |       |
|----------|--------|-------------------|---------------|---------------|-------|
| Mutation | Target | Prediction        | Score         | Stability     | DDG   |
| S384P    | nsp12  | Possibly Damaging | 0.715         | Decrease      | -0.07 |
| M463I    | nsp12  | Possibly Damaging | 0.929         | Decrease      | -0.55 |
| Q822H    | nsp12  | Benign            | 0.000         | Decrease      | -1.29 |
| L838I    | nsp12  | Probably Damaging | 0.998         | Decrease      | -1.61 |
| P77L     | nsp13  | Probably Damaging | 1             | Decrease      | -1.03 |
| V89I     | nsp13  | Benign            | 0.103         | Decrease      | -0.78 |
| P46L     | nsp14  | Possibly Damaging | 0.557         | Decrease      | -1.39 |
| R289H    | nsp14  | Possibly Damaging | 0.860         | Decrease      | -2.11 |
| S374F    | nsp14  | Benign            | 0.001         | Decrease      | -0.16 |
| A394V    | nsp14  | Benign            | 0.005         | Decrease      | -0.17 |
| A80V     | nsp15  | Benign            | 0.002         | Decrease      | -0.66 |
| A81V     | nsp15  | Probably Damaging | 0.988         | Decrease      | -0.43 |
| V9I      | nsp16  | Benign            | 0.018         | Increase      | 0.31  |
| A34V     | nsp16  | Benign            | 0.018         | Decrease      | -1.3  |
| P215L    | nsp16  | Benign            | 0.000         | Decrease      | -1.68 |
| P215T    | nsp16  | Benign            | 0.000         | Decrease      | -1.92 |
| L5F      | spike  | Unknown           | not available | Decrease      | -0.10 |
| V70I     | spike  | Benign            | 0.000         | Decrease      | -1.58 |
| V70F     | spike  | Benign            | 0.066         | Decrease      | -2.72 |
| T95I     | spike  | Probably Damaging | 0.999         | Decrease      | -1.8  |
| G142D    | spike  | Benign            | 0.03          | Decrease      | -1.17 |
| G142Y    | spike  | Benign            | 0.278         | Decrease      | -0.24 |
| G142H    | spike  | Possibly Damaging | 0.867         | Decrease      | -1.57 |
| G142V    | spike  | Benign            | 0             | Decrease      | -0.48 |
| A222V    | spike  | Benign            | 0             | Increase      | 0.48  |
| A222S    | spike  | Benign            | 0.001         | Decrease      | -0.68 |
| V367L    | spike  | Possibly Damaging | 0.852         | Decrease      | -1.06 |
| V367H    | spike  | Probably Damaging | 1             | Decrease      | -2.32 |
| V367F    | spike  | Possibly Damaging | 0.852         | Decrease      | -3.08 |
| L452R    | spike  | Benign            | 0.017         | Decrease      | -1.40 |
| Q613H    | spike  | Probably Damaging | 0.988         | Decrease      | -1.47 |
| N501Y    | spike  | Benign            | 0.206         | Decrease      | -0.34 |
| D614G    | spike  | Benign            | 0.009         | Decrease      | -1.94 |
| Q677H    | spike  | Benign            | 0.157         | Increase      | 0.10  |
| P681R    | spike  | Unknown           | not available | Decrease      | -0.79 |
| D950N    | spike  | Benign            | 0.340         | Increase      | 0.15  |
| V1104L   | spike  | Benign            | 0.001         | Decrease      | -0.09 |
| V1128L   | spike  | Possibly Damaging | 0.900         | Decrease      | -1.14 |
| G1219V   | spike  | Probably Damaging | 0.998         | Decrease      | -1.76 |
| G1219C   | spike  | Probably Damaging | 1             | Decrease      | -1.81 |

|          |        | PolyPhen - 2      |       | I- Mutant 2.0 |       |
|----------|--------|-------------------|-------|---------------|-------|
| Mutation | Target | Prediction        | Score | Stability     | DDG   |
| L41F     | ORF3a  | Benign            | 0.006 | Decrease      | -1.36 |
| L41I     | ORF3a  | Benign            | 0.286 | Decrease      | -0.93 |
| A110S    | ORF3a  | Possibly Damaging | 0.898 | Decrease      | -1.01 |
| A110V    | ORF3a  | Probably Damaging | 0.998 | Increase      | 0.91  |
| I82T     | M      | Possibly Damaging | 0.889 | Decrease      | -2.41 |
| Q9L      | N      | Benign            | 0.191 | Increase      | 0.31  |
| Q9H      | N      | Possibly Damaging | 0.803 | Decrease      | -0.39 |
