# Supplementary material for: Tracking the Selective Pressure Profile and Gene Flow of SARS-CoV-2 Delta Variant in Italy from April to October 2021 and Frequencies of Key Mutations from Three Representative Italian Regions
Source: MDPI journal article supplement (doi:10.3390/microorganisms11112644), 2023-10-27
Supplement: s1 [file s1]

**Table S3.** Significance identified for each amino acid mutation in the comparison of the data among the three regions.

| Mutation | Lazio - Sicily | Lazio - Veneto | Veneto - Sicily |
|----------|----------------|----------------|-----------------|
| P62S     | n.s.           | n.s.           | n.s.            |
| E87D     | n.s.           | s.             | s.              |
| G94S     | s.             | s.             | s.              |
| G94V     | n.s.           | /              | n.s.            |
| R27C     | /              | /              | /               |
| K81N     | s.             | n.s.           | s.              |
| E89K     | s.             | /              | s.              |
| P129L    | n.s.           | n.s.           | n.s.            |
| P129S    | /              | /              | /               |
| D155G    | n.s.           | n.s.           | n.s.            |
| A159V    | /              | /              | /               |
| S263F    | s.             | n.s.           | s.              |
| A318V    | s.             | n.s.           | s.              |
| G339S    | n.s.           | n.s.           | n.s.            |
| V485I    | n.s.           | n.s.           | n.s.            |
| Q496P    | n.s.           | n.s.           | n.s.            |
| Q496H    | /              | /              | /               |
| S126L    | /              | n.s.           | n.s.            |
| K384N    | n.s.           | n.s.           | n.s.            |
| L862F    | /              | /              | /               |
| P1228L   | s.             | n.s.           | s.              |
| L1791F   | /              | n.s.           | n.s.            |
| T204I    | n.s.           | n.s.           | n.s.            |
| D279N    | /              | /              | /               |
| T295I    | s.             | /              | s.              |
| C296F    | n.s.           | n.s.           | n.s.            |
| A2V      | s.             | n.s.           | s.              |
| T6I      | s.             | s.             | /               |
| Q27R     | /              | s.             | s.              |
| L37F     | s.             | s.             | n.s.            |
| A46S     | s.             | /              | s.              |
| E61D     | s.             | /              | s.              |
| E61K     | /              | /              | /               |
| A95S     | n.s.           | n.s.           | /               |
| T141I    | /              | /              | /               |
| R197Q    | s.             | n.s.           | s.              |
| P323L    | s.             | /              | s.              |

| Mutation | Lazio - Sicily | Lazio - Veneto | Veneto - Sicily |
|----------|----------------|----------------|-----------------|
| S384P    | n.s.           | n.s.           | n.s.            |
| M463I    | n.s.           | n.s.           | n.s.            |
| Q822H    | s.             | s.             | s.              |
| L838I    | s.             | n.s.           | s.              |
| P77L     | /              | s.             | s.              |
| V89I     | /              | /              | /               |
| P46L     | n.s.           | n.s.           | n.s.            |
| R289H    | s.             | s.             | n.s.            |
| S374F    | n.s.           | n.s.           | n.s.            |
| A394V    | s.             | n.s.           | s.              |
| A80V     | s.             | /              | n.s.            |
| A81V     | n.s.           | n.s.           | /               |
| V9I      | /              | /              | /               |
| A34V     | n.s.           | s.             | n.s.            |
| P215L    | n.s.           | n.s.           | /               |
| P215T    | n.s.           | n.s.           | n.s.            |
| L5F      | n.s.           | n.s.           | n.s.            |
| V70I     | /              | /              | /               |
| V70F     | /              | /              | /               |
| T95I     | s.             | n.s.           | s.              |
| G142D    | s.             | s.             | s.              |
| G142Y    | /              | /              | /               |
| G142H    | /              | /              | /               |
| G142V    | /              | /              | /               |
| A222V    | s.             | n.s.           | s.              |
| A222S    | /              | /              | /               |
| V367L    | /              | /              | /               |
| V367H    | /              | /              | /               |
| V367F    | /              | /              | /               |
| L452R    | s.             | s.             | /               |
| Q613H    | s.             | n.s.           | s.              |
| N501Y    | n.s.           | /              | n.s.            |
| D614G    | /              | /              | /               |
| Q677H    | s.             | ns             | s.              |
| P681R    | /              | /              | /               |
| D950N    | s.             | s.             | s.              |
| V1104L   | n.s.           | n.s.           | n.s.            |
| V1128L   | /              | /              | /               |
| G1219V   | n.s.           | /              | n.s.            |
| G1219C   | /              | /              | /               |
| L41F     | n.s.           | n.s.           | n.s.            |

| Mutation | Lazio - Sicily | Lazio - Veneto | Veneto - Sicily |
|----------|----------------|----------------|-----------------|
| L41I     | /              | /              | /               |
| A110S    | s.             | n.s.           | s.              |
| A110V    | /              | /              | /               |
| I82T     | /              | /              | /               |
| Q9L      | s.             | n.s.           | s.              |
| Q9H      | /              | /              | /               |

n.s. not significant

s. significant
